# Supplementary material
Source: MDPI journal article supplement (https://www.mdpi.com/2073-4441/15/6/1136)
Supplement: s1 [file s1]

**Table S1.** The chemical structures of PPCPs molecules and their physicochemical properties.

| Compound             | Log K <sub>ow</sub> | pKa  | Water solubility (mg/L) | MW g/mol | Chemical Formula | CAS       | Structure |
|----------------------|---------------------|------|-------------------------|----------|------------------|-----------|-----------|
| <i>Sulfonamides</i>  |                     |      |                         |          |                  |           |           |
| Sulfadimethoxine     | 1.63                | 5.94 | 46.3                    | 310.33   | C12H14N4O4S      | 122-11-2  |           |
| Sulfamethoxazole     | 0.89                | 5.6  | 610                     | 253.28   | C10H11N3O3S      | 723-46-6  |           |
| Sulfamonomethoxine   |                     | 5.94 | 10                      | 280.3    | C11H12N4O3S      | 1220-83-3 |           |
| Sulfamerazine        | 0.14                | 2.29 | 202                     | 264.3    | C11H12N4O2S      | 127-79-7  |           |
| Sulfamethazine       | 0.14                | 2.65 | 150                     | 278.33   | C12H14N4O2S      | 57-68-1   |           |
| Sulfachinoxalin      | 1.68                | 5.65 | >45.1                   | 300.34   | C14H12N4O2S      | 59-40-5   |           |
| <i>tetracyclines</i> |                     |      |                         |          |                  |           |           |

|                    |       |      |      |        |                                                                 |            |                                                                                       |
|--------------------|-------|------|------|--------|-----------------------------------------------------------------|------------|---------------------------------------------------------------------------------------|
| Tetracycline       | 1.30  | 3.3  | 231  | 444.43 | C <sub>22</sub> H <sub>24</sub> N <sub>2</sub> O <sub>8</sub>   | 60-54-8    | 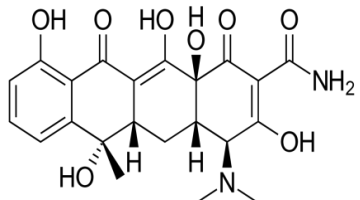   |
| Oxytetracycline    | -0.90 | 3.27 | 200  | 460.43 | C <sub>22</sub> H <sub>24</sub> N <sub>2</sub> O <sub>9</sub>   | 79-57-2    |    |
| Chlorotetracycline |       | 3.3  | 630  | 478.88 | C <sub>22</sub> H <sub>23</sub> ClN <sub>2</sub> O <sub>8</sub> | 57-62-5    |    |
| Doxycycline        | 0.63  | 3.09 | 630  | 444.43 | C <sub>22</sub> H <sub>24</sub> N <sub>2</sub> O <sub>8</sub>   | 564-25-0   |   |
| <i>quinolones</i>  |       |      |      |        |                                                                 |            |                                                                                       |
| Enrofloxacin       |       | 6.43 | 53.9 | 359.39 | C <sub>19</sub> H <sub>22</sub> FN <sub>3</sub> O <sub>3</sub>  | 93106-60-6 |  |

|                             |      |       |       |        |                                                                       |            |                                                                                       |
|-----------------------------|------|-------|-------|--------|-----------------------------------------------------------------------|------------|---------------------------------------------------------------------------------------|
| Ciprofloxacin               | 0.28 | 4.04  | 86    | 331.34 | C <sub>17</sub> H <sub>18</sub> FN <sub>3</sub> O <sub>3</sub>        | 85721-33-1 | 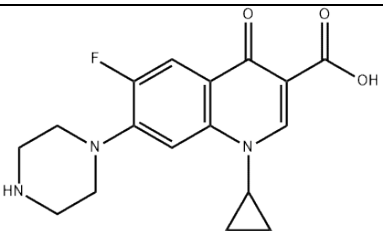   |
| <b><i>Beta-agonist</i></b>  |      |       |       |        |                                                                       |            |                                                                                       |
| Clenbuterol hydrochloride   |      |       | 46.5  | 313.65 | C <sub>12</sub> H <sub>19</sub> Cl <sub>3</sub> N <sub>2</sub> O      | 21898-19-1 |    |
| Salbutamol                  | 0.64 | 9.07  | 17950 | 239.32 | C <sub>13</sub> H <sub>21</sub> NO <sub>3</sub>                       | 18559-94-9 |    |
| Cimaterol                   |      | 13.75 |       | 219.28 | C <sub>12</sub> H <sub>17</sub> N <sub>3</sub> O                      | 54239-37-1 |   |
| Ractopamine                 | 2.4  | 9.97  | 4100  | 301.38 | C <sub>18</sub> H <sub>23</sub> NO <sub>3</sub>                       | 97825-25-7 |  |
| <b><i>Chloromycetin</i></b> |      |       |       |        |                                                                       |            |                                                                                       |
| Florfenicol                 |      | 10.73 |       | 358.21 | C <sub>12</sub> H <sub>14</sub> Cl <sub>2</sub> FNO <sub>4</sub><br>S | 73231-34-2 |  |

|                        |      |       |       |         |                                                                               |          |                                                                                     |
|------------------------|------|-------|-------|---------|-------------------------------------------------------------------------------|----------|-------------------------------------------------------------------------------------|
| Chloramphenicol        | 1.14 | 11.03 | 2500  | 323.13  | C <sub>11</sub> H <sub>12</sub> Cl <sub>2</sub> N <sub>2</sub> O <sub>5</sub> | 56-75-7  | 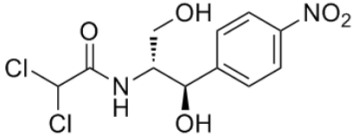 |
| <i>anticonvulsan</i>   |      |       |       |         |                                                                               |          |                                                                                     |
| Carbamazepine          | 2.45 | 13.94 | 35.4  | 236.27  | C <sub>15</sub> H <sub>12</sub> N <sub>2</sub> O                              | 298-46-4 |  |
| <i>Human Indicator</i> |      |       |       |         |                                                                               |          |                                                                                     |
| Caffeine               | 0.07 | 10.4  | 21600 | 194.194 | C <sub>8</sub> H <sub>10</sub> N <sub>4</sub> O <sub>2</sub>                  | 58-08-2  |  |

**Table S2.** Optimized MS/MS parameters for PPCPs.

| Compound           | ESI mode | Precursor ion<br>(m/z) | Product ion<br>(m/z) | Declustering voltage<br>(V) | Entrance voltage<br>(V) | Collision energy<br>(V) | Export voltage<br>(V) |
|--------------------|----------|------------------------|----------------------|-----------------------------|-------------------------|-------------------------|-----------------------|
| sulfadimethoxine   | Positive | 311.1                  | 156.1*               | 130                         | 10                      | 27                      | 9                     |
|                    | Positive | 311.1                  | 92.1                 | 130                         | 10                      | 44                      | 16                    |
| sulfamethoxazole   | Positive | 254.1                  | 156.0*               | 100                         | 10                      | 22                      | 10                    |
|                    | Positive | 254.1                  | 92.1                 | 100                         | 10                      | 35                      | 16                    |
| sulfamonomethoxine | Positive | 281.1                  | 108.0                | 80                          | 10                      | 34                      | 7                     |
|                    | Positive | 281.1                  | 156.0*               | 80                          | 10                      | 23                      | 13                    |
| sulfamerazine      | Positive | 265.1                  | 156.0*               | 80                          | 10                      | 23                      | 9                     |
|                    | Positive | 265.1                  | 172.1                | 80                          | 10                      | 22                      | 6                     |
| sulfamethazine     | Positive | 279.0                  | 156.0*               | 90                          | 10                      | 25                      | 5                     |
|                    | Positive | 279.0                  | 186.0                | 90                          | 10                      | 23                      | 7                     |
| sulfachinoxalin    | Positive | 301.1                  | 156.0*               | 80                          | 10                      | 21                      | 9                     |
|                    | Positive | 301.1                  | 92.1                 | 80                          | 10                      | 38                      | 6                     |
| tetracycline       | Positive | 445.2                  | 410.1*               | 160                         | 10                      | 27                      | 17                    |
|                    | Positive | 445.2                  | 154.1                | 160                         | 10                      | 35                      | 10                    |
| oxytetracycline    | Positive | 462.3                  | 426.0*               | 100                         | 10                      | 26                      | 18                    |
|                    | Positive | 462.3                  | 443.1                | 100                         | 10                      | 21                      | 8                     |
| chlorotetracycline | Positive | 479.2                  | 462.0                | 36                          | 10                      | 23                      | 18                    |
|                    | Positive | 479.2                  | 444.1*               | 36                          | 10                      | 29                      | 18                    |
| doxycycline        | Positive | 445.2                  | 428.1*               | 160                         | 10                      | 24                      | 17                    |
|                    | Positive | 445.2                  | 154.1                | 160                         | 10                      | 39                      | 13                    |
| enrofloxacin       | Positive | 360.2                  | 342.2*               | 170                         | 10                      | 29                      | 14                    |
|                    | Positive | 360.2                  | 316.2                | 170                         | 10                      | 27                      | 5                     |
| ciprofloxacin      | Positive | 332.1                  | 314.1*               | 100                         | 10                      | 28                      | 13                    |
|                    | Positive | 332.1                  | 288.2                | 100                         | 10                      | 24                      | 6                     |
| clenbuterol        | Positive | 277.1                  | 259.1                | 60                          | 10                      | 15                      | 7                     |
|                    | Positive | 277.1                  | 203.0*               | 60                          | 10                      | 24                      | 7                     |
| salbutamol         | Positive | 240.2                  | 166.1                | 60                          | 10                      | 18                      | 10                    |
|                    | Positive | 240.2                  | 148.1*               | 60                          | 10                      | 20                      | 10                    |
| cimaterol          | Positive | 220.2                  | 116.1                | 60                          | 10                      | 46                      | 15                    |
|                    | Positive | 220.2                  | 143.1*               | 60                          | 10                      | 32                      | 15                    |
| ractopamine        | Positive | 302.1                  | 284.1*               | 40                          | 10                      | 16                      | 5                     |
|                    | Positive | 302.1                  | 164.1                | 40                          | 10                      | 23                      | 7                     |
| carbamazepine      | Positive | 237.1                  | 194.1*               | 130                         | 10                      | 26                      | 7                     |
|                    | Positive | 237.1                  | 179.1                | 130                         | 10                      | 46                      | 12                    |
| caffeine           | Positive | 195.1                  | 138.1*               | 90                          | 10                      | 26                      | 8                     |
|                    | Positive | 195.1                  | 110.0                | 90                          | 10                      | 29                      | 8                     |
| atrazine           | Positive | 216.1                  | 174.1*               | 120                         | 10                      | 23                      | 9                     |
|                    | Positive | 216.1                  | 96.1                 | 120                         | 10                      | 31                      | 7                     |
| chloramphenicol    | negative | 320.9                  | 256.8                | -110                        | -10                     | -15                     | -10                   |
|                    | negative | 320.9                  | 152.0*               | -110                        | -10                     | -22                     | -10                   |
| florfenicol        | negative | 356.0                  | 185.0                | -90                         | -13                     | -26                     | -9                    |
|                    | negative | 356.0                  | 335.9*               | -90                         | -13                     | -13                     | -20                   |

\*—represent Quantitative ion.

**Table S3.** Limits of detection (LOD) of the analytes, linear equation and linearity of calibration.

| Compounds          | Linear equation (y=ax+b) | R      | LOD (ng/L) |
|--------------------|--------------------------|--------|------------|
| sulfadimethoxine   | $Y=0.18X+0.0743$         | 0.9994 | 0.25       |
| sulfamethoxazole   | $Y=0.0749X-0.00716$      | 0.9999 | 0.25       |
| sulfamonomethoxine | $Y=0.0628X-0.00101$      | 0.9999 | 0.25       |
| sulfamerazine      | $Y=0.0853X-0.01$         | 0.9999 | 0.25       |
| sulfamethazine     | $Y=0.134X+0.168$         | 0.9995 | 0.25       |
| sulfachinoxalin    | $Y=0.112X+0.00966$       | 0.9997 | 0.25       |
| tetracycline       | $Y=0.0156X-0.0924$       | 0.9906 | 5          |
| oxytetracycline    | $Y=0.00813X-0.0696$      | 0.9910 | 5          |
| chlorotetracycline | $Y=0.0105X-0.112$        | 0.9922 | 5          |
| doxycycline        | $Y=0.0322X-0.445$        | 0.9935 | 5          |
| enrofloxacin       | $Y=0.274X-0.891$         | 0.9984 | 1          |
| ciprofloxacin      | $Y=0.125X-2.97$          | 0.9911 | 1          |
| clenbuterol        | $Y=0.412X+1.03$          | 0.9951 | 0.05       |
| salbutamol         | $Y=0.145X+0.331$         | 0.9949 | 0.05       |
| cimaterol          | $Y=0.0871X+0.0836$       | 0.9991 | 0.05       |
| ractopamine        | $Y=0.256X+1.42$          | 0.9951 | 0.05       |
| carbamazepine      | $Y=0.512X+1.32$          | 0.9949 | 0.05       |
| caffeine           | $Y=0.0514X+0.0292$       | 0.9979 | 2.5        |
| atrazine           | $Y=0.341X+0.775$         | 0.9978 | 0.05       |
| chloramphenicol    | $Y=10700X+18600$         | 0.9995 | 0.05       |
| florfenicol        | $Y=15000X+23400$         | 0.9994 | 0.05       |

**Table S4.** The concentration of PPCPs in all sampling points in wet and dry season.

| Sampling points | SMX   |       | SMM  |       | SMZ   |      | EFX  |     | CFX    |     | CBZ   |     | CAF    |        | CMP  |     | FFC    |       |
|-----------------|-------|-------|------|-------|-------|------|------|-----|--------|-----|-------|-----|--------|--------|------|-----|--------|-------|
|                 | Wet   | Dry   | Wet  | Dry   | Wet   | Dry  | Wet  | Dry | Wet    | Dry | Wet   | Dry | Wet    | Dry    | Wet  | Dry | Wet    | Dry   |
| R1              | ND    | ND    | ND   | 8.60  | ND    | ND   | ND   | ND  | ND     | ND  | 1.66  | ND  | 815.00 | 20.30  | ND   | ND  | 11.00  | 1.33  |
| R2              | 3.40  | 0.70  | 0.53 | 0.67  | ND    | ND   | ND   | ND  | ND     | ND  | 0.80  | ND  | 85.00  | 105.50 | ND   | ND  | 29.70  | 2.85  |
| R3              | 1.63  | 0.79  | 0.89 | 0.79  | ND    | ND   | ND   | ND  | ND     | ND  | 1.00  | ND  | 77.00  | 115.50 | ND   | ND  | 51.50  | 4.38  |
| R4              | 2.41  | 0.61  | 0.53 | 0.83  | ND    | ND   | ND   | ND  | ND     | ND  | 0.50  | ND  | 135.00 | 66.50  | ND   | ND  | 59.00  | 2.40  |
| R5              | 0.90  | 0.58  | 1.22 | 0.69  | 0.60  | 0.32 | ND   | ND  | ND     | ND  | 0.15  | ND  | 25.80  | 74.00  | ND   | ND  | 37.05  | 16.90 |
| R6              | 10.10 | 5.90  | 2.74 | 0.80  | 1.01  | 0.30 | ND   | ND  | ND     | ND  | 0.20  | ND  | 131.00 | 46.05  | ND   | ND  | 56.00  | 18.65 |
| R7              | ND    | 4.72  | 1.66 | 1.07  | ND    | 0.43 | ND   | ND  | ND     | ND  | 0.81  | ND  | 77.00  | 47.70  | ND   | ND  | 12.45  | 14.85 |
| R8              | 0.90  | ND    | ND   | 13.80 | ND    | ND   | ND   | ND  | 775.00 | ND  | 18.90 | ND  | 127.50 | 31.35  | 3.43 | ND  | 14.80  | 13.05 |
| R9              | ND    | ND    | ND   | ND    | ND    | ND   | ND   | ND  | ND     | ND  | 0.79  | ND  | 114.00 | 83.50  | 0.40 | ND  | 26.85  | ND    |
| R10             | 0.50  | 0.27  | ND   | 0.45  | ND    | ND   | ND   | ND  | ND     | ND  | 0.15  | ND  | 18.70  | 65.00  | ND   | ND  | 0.15   | 11.55 |
| R11             | 3.56  | 0.25  | 0.60 | ND    | ND    | 0.33 | ND   | ND  | ND     | ND  | 0.30  | ND  | 78.00  | 57.50  | ND   | ND  | 28.00  | 1.49  |
| R12             | ND    | 0.30  | ND   | 0.28  | ND    | ND   | ND   | ND  | ND     | ND  | ND    | ND  | 119.50 | 32.10  | ND   | ND  | ND     | 6.25  |
| R13             | 1.15  | 0.34  | 0.55 | ND    | ND    | ND   | ND   | ND  | ND     | ND  | 0.20  | ND  | 53.50  | 13.95  | ND   | ND  | 0.48   | ND    |
| R14             | 2.74  | ND    | 0.79 | 0.31  | 2.54  | ND   | 3.74 | ND  | 8.80   | ND  | 0.75  | ND  | 49.65  | 35.95  | 0.40 | ND  | 690.00 | 0.81  |
| R15             | ND    | 14.90 | 1.33 | 0.56  | 0.38  | 0.55 | ND   | ND  | ND     | ND  | 0.40  | ND  | 34.95  | 49.40  | ND   | ND  | 2.01   | 4.99  |
| R16             | ND    | ND    | ND   | ND    | ND    | ND   | ND   | ND  | ND     | ND  | 0.30  | ND  | 47.60  | 4.73   | ND   | ND  | 4.42   | 1.34  |
| R17             | 1.21  | 47.15 | 7.75 | 3.58  | 3.24  | 0.58 | ND   | ND  | ND     | ND  | ND    | ND  | 23.20  | 16.85  | ND   | ND  | 172.50 | 12.95 |
| R18             | 1.05  | 0.69  | 2.68 | ND    | 10.50 | 0.48 | 2.15 | ND  | ND     | ND  | 0.35  | ND  | 81.00  | 36.65  | 1.34 | ND  | 101.50 | 24.65 |
| R19             | 35.25 | 28.00 | 1.96 | 1.98  | 1.12  | 0.57 | ND   | ND  | ND     | ND  | 0.51  | ND  | 122.00 | 81.00  | ND   | ND  | 140.50 | 74.50 |

ND—not detectable.

**Table S5.** The EC<sub>50</sub>, LC<sub>50</sub> and PNEC of PPCPs to aquatic organism.

| Compound | Species     | PNEC (ng/L) | MECwet (ng/L) | MECdry (ng/L) | RQwet    | RQdry    |
|----------|-------------|-------------|---------------|---------------|----------|----------|
| SMX      | Fish        | 410762      | 35.25         | 47.15         | 8.58E-05 | 1.15E-04 |
|          | Daphnia     | 1872        | 35.25         | 47.15         | 1.88E-02 | 2.52E-02 |
|          | Green algae | 6615        | 35.25         | 47.15         | 5.33E-03 | 7.13E-03 |
| SMM      | Fish        | 2351876     | 7.75          | 13.8          | 3.30E-06 | 5.87E-06 |
|          | Daphnia     | 1198        | 7.75          | 13.8          | 6.47E-03 | 1.15E-02 |
|          | Green algae | 8772        | 7.75          | 13.8          | 8.83E-04 | 1.57E-03 |
| SMZ      | Fish        | 291394      | 10.5          | 0.58          | 3.60E-05 | 1.99E-06 |
|          | Daphnia     | 2045        | 10.5          | 0.58          | 5.13E-03 | 2.83E-04 |
|          | Green algae | 6259        | 10.5          | 0.58          | 1.68E-03 | 9.27E-05 |
| EFX      | Fish        | 4922627     | 3.74          | ND            | 7.60E-07 | 0        |
|          | Daphnia     | 504571      | 3.74          | ND            | 7.41E-06 | 0        |
|          | Green algae | 561233      | 3.74          | ND            | 6.66E-06 | 0        |
| CFX      | Fish        | 13131424    | 775           | ND            | 5.90E-05 | 0        |
|          | Daphnia     | 1240427     | 775           | ND            | 6.25E-04 | 0        |
|          | Green algae | 1621628     | 775           | ND            | 4.78E-04 | 0        |
| CBZ      | Fish        | 41330       | 18.9          | ND            | 4.57E-04 | 0        |
|          | Daphnia     | 14902       | 18.9          | ND            | 1.27E-03 | 0        |
|          | Green algae | 256         | 18.9          | ND            | 7.38E-02 | 0        |
| CAF      | Fish        | 111495      | 815           | 115.5         | 7.31E-03 | 1.04E-03 |
|          | Daphnia     | 11925       | 815           | 115.5         | 6.83E-02 | 9.69E-03 |
|          | Green algae | 772         | 815           | 115.5         | 1.06E+00 | 1.50E-01 |
| CMP      | Fish        | 883291      | 3.43          | ND            | 3.88E-06 | 0        |
|          | Daphnia     | 643462      | 3.43          | ND            | 5.33E-06 | 0        |
|          | Green algae | 185308      | 3.43          | ND            | 1.85E-05 | 0        |
| FFC      | Fish        | 6764040     | 690           | 74.5          | 1.02E-04 | 1.10E-05 |
|          | Daphnia     | 4570401     | 690           | 74.5          | 1.51E-04 | 1.63E-05 |
|          | Green algae | 912554      | 690           | 74.5          | 7.56E-04 | 8.16E-05 |



MEC—the Max Environmental Concentration; RQ—the Risk quotients corresponding to the maximum environmental concentration.
